# Supplementary material for: The scaffold protein WRAP53β orchestrates the ubiquitin response critical for DNA double-strand break repair
Source: PubMed Central journal article supplement (PMC4265676; doi:10.1101/gad.246546.114), 2014-12-15

# Farnebo\_FigS1

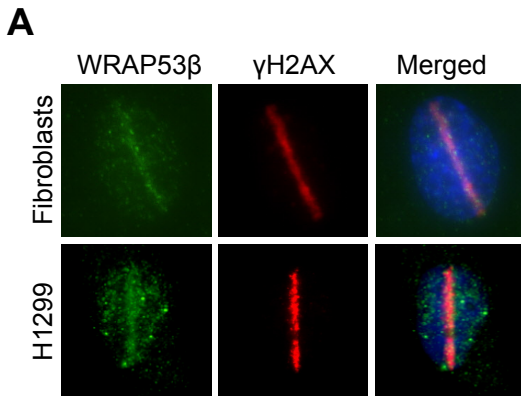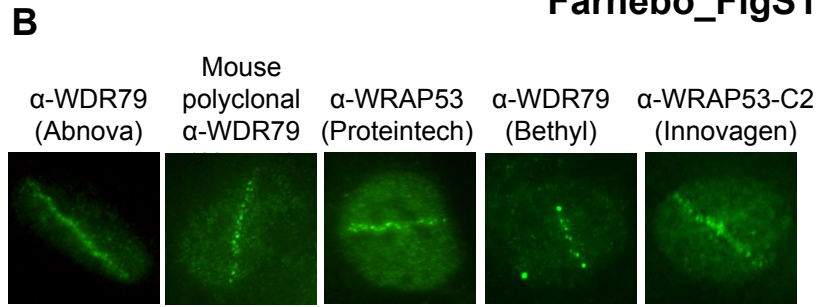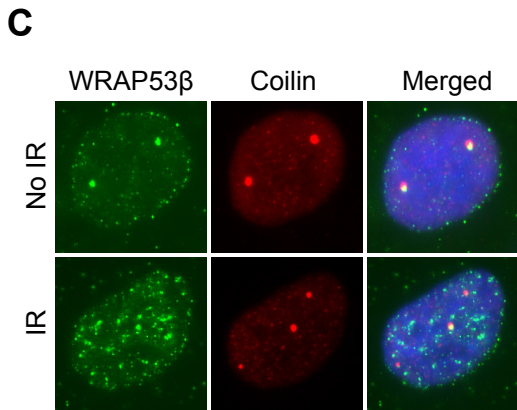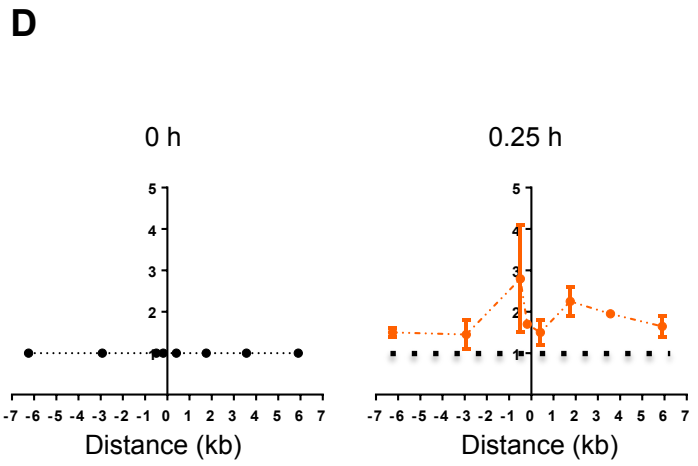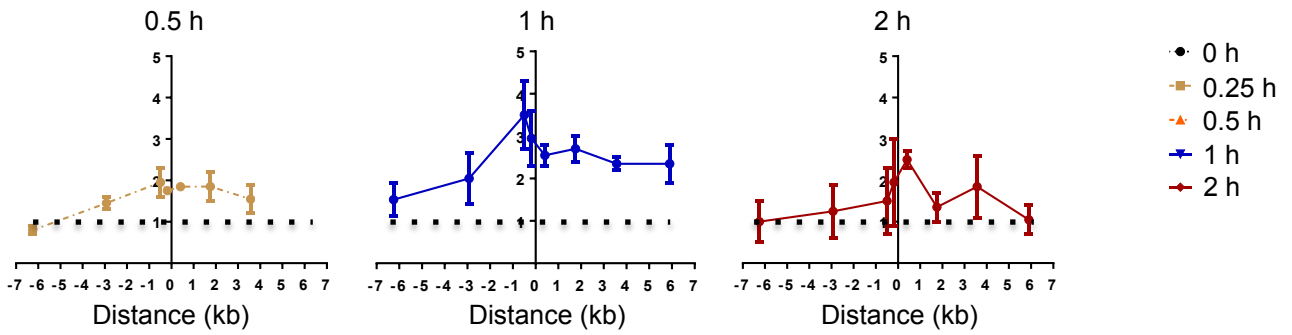

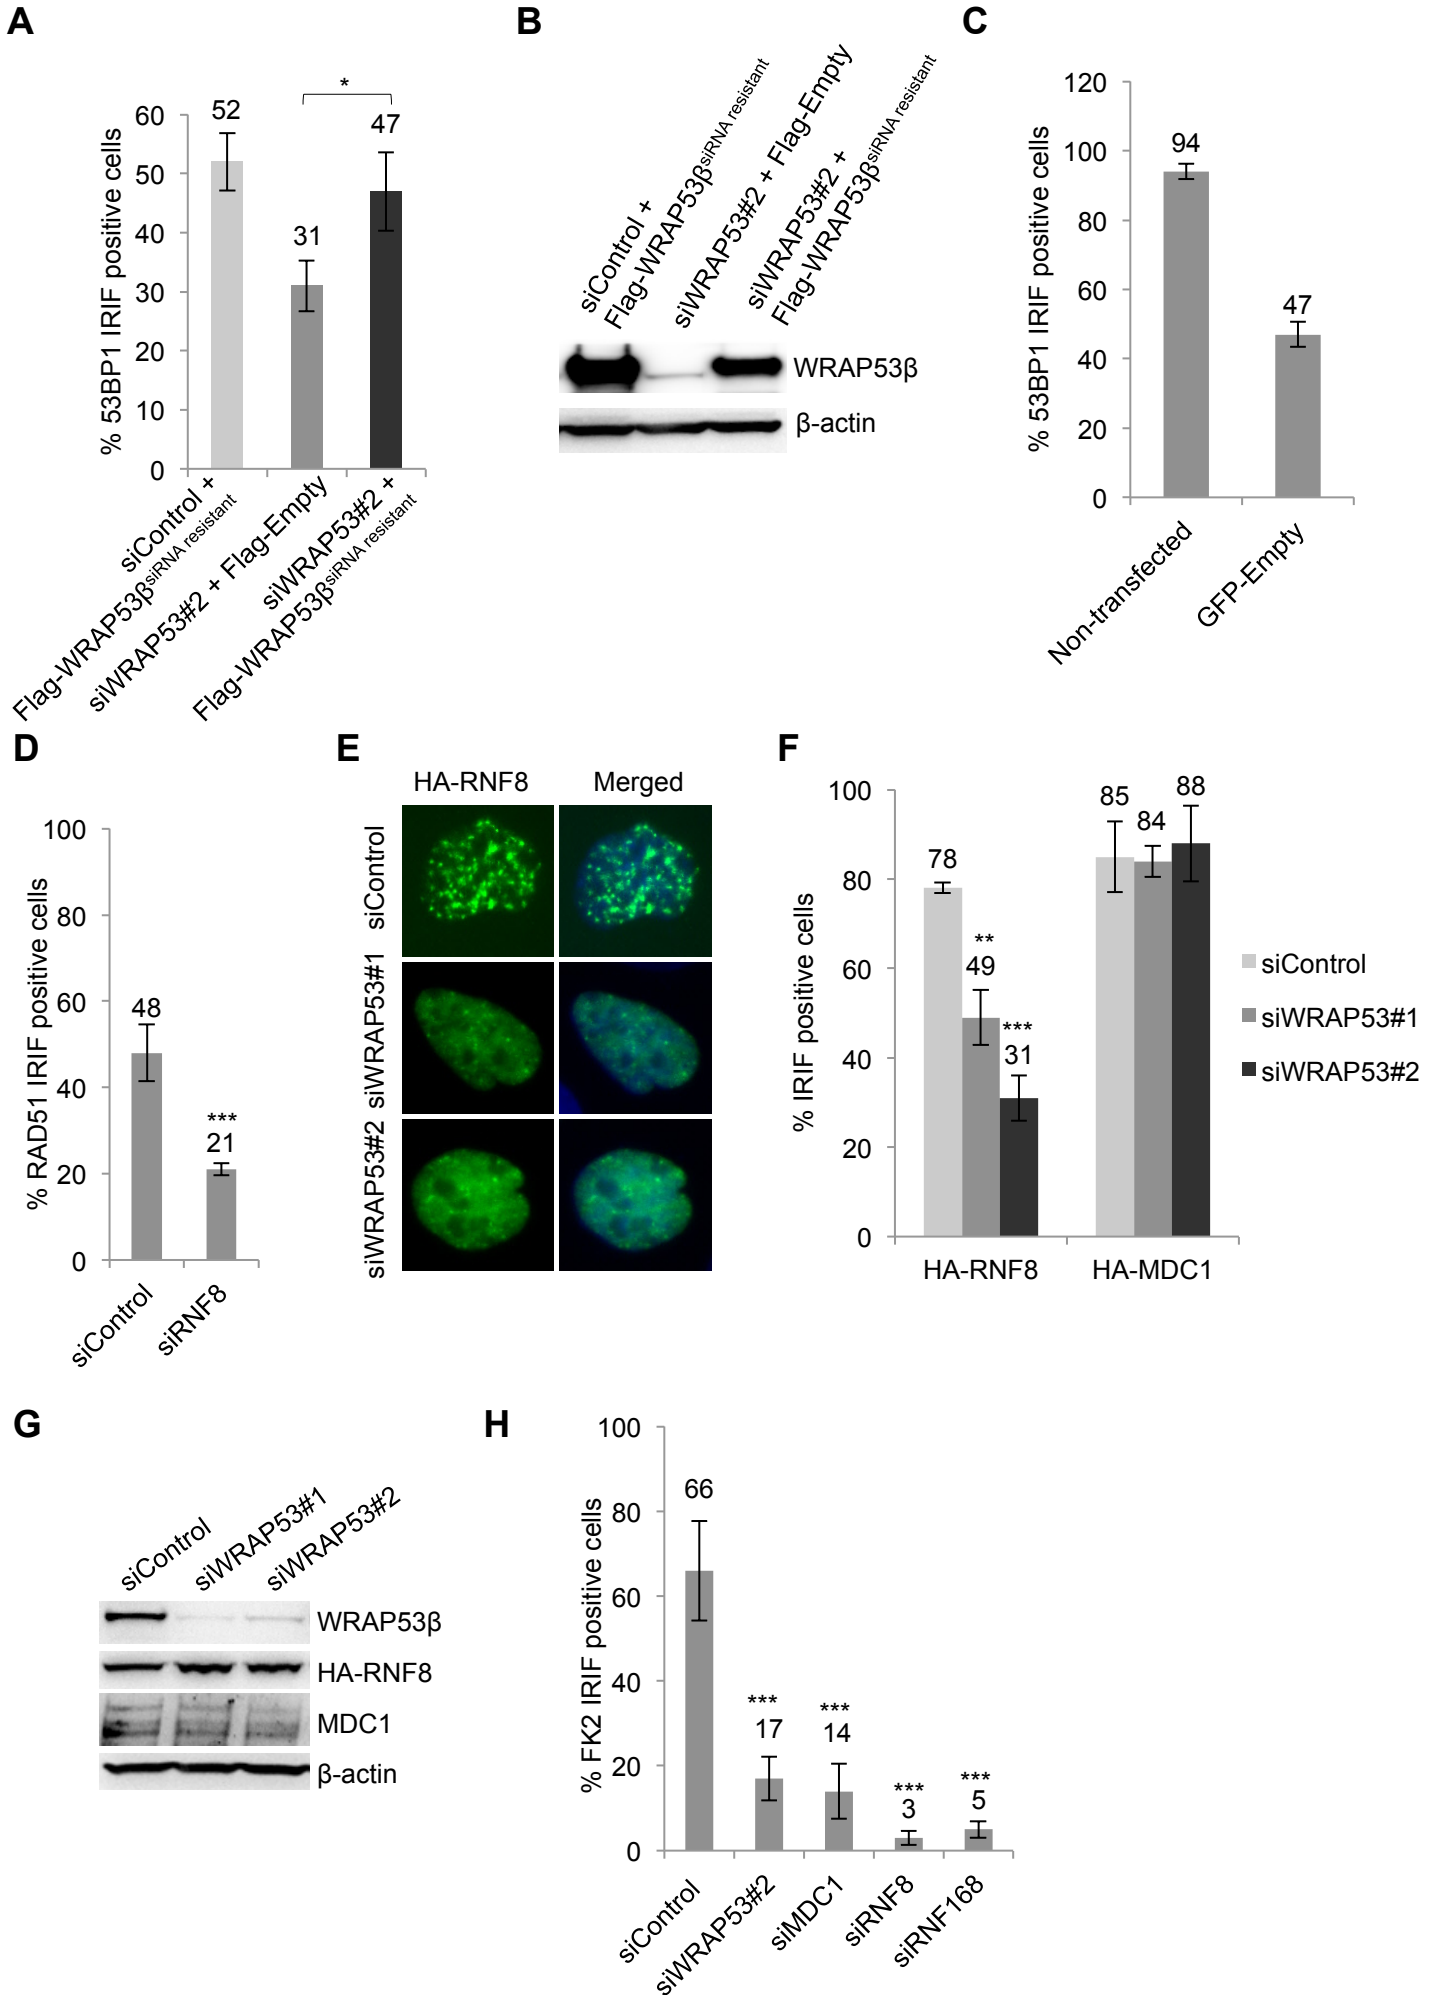

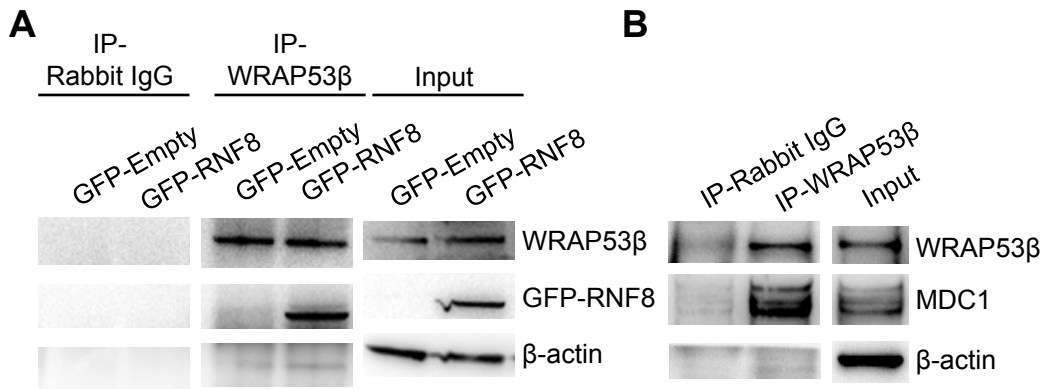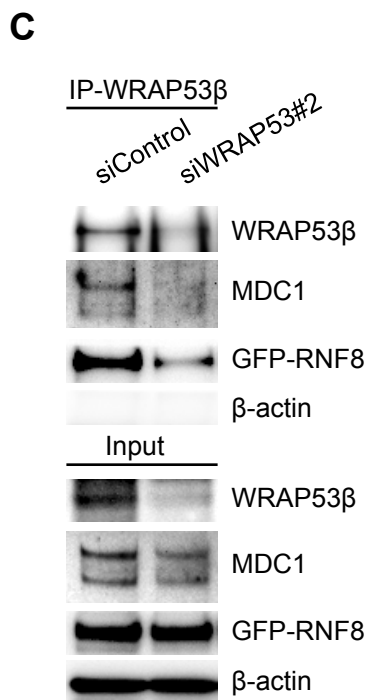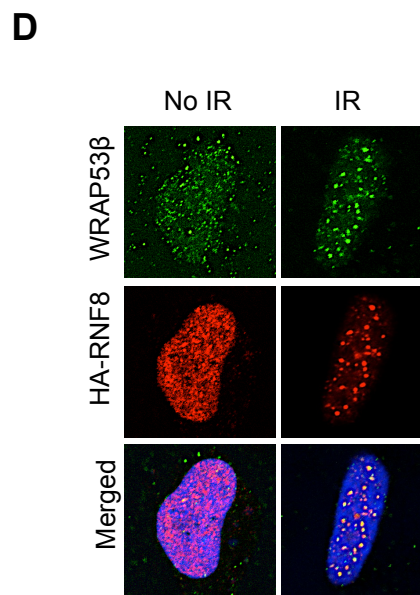

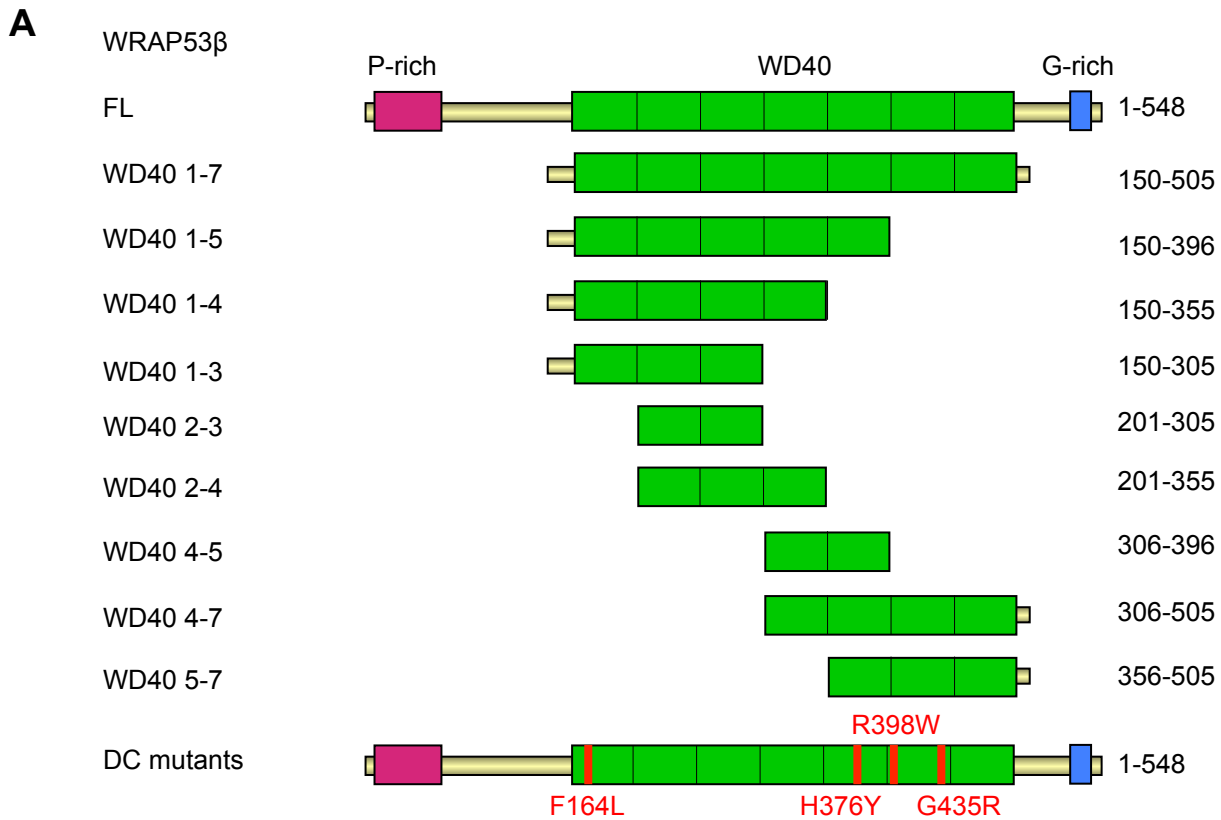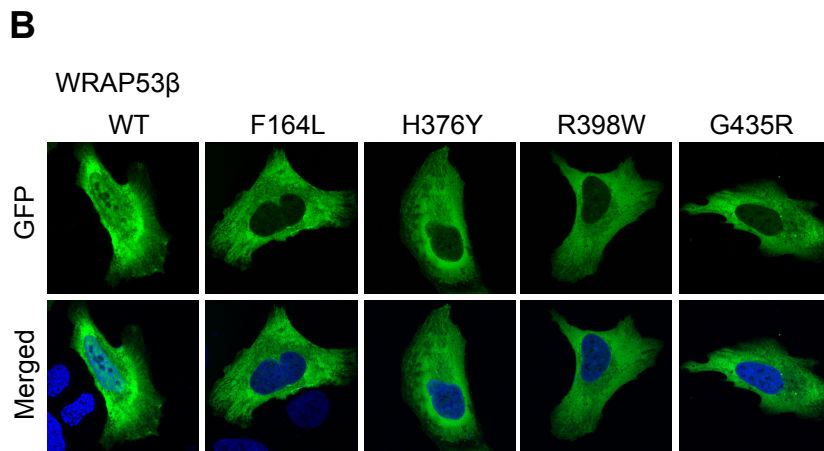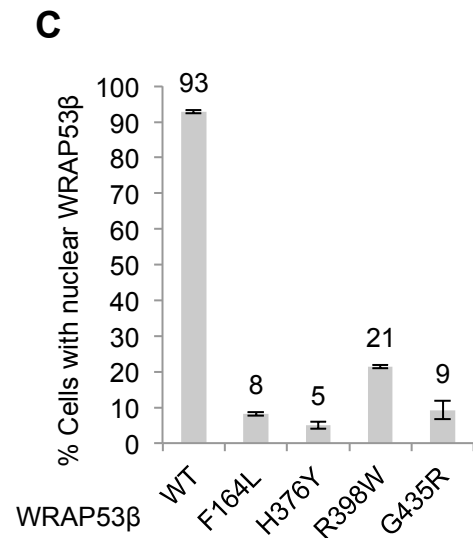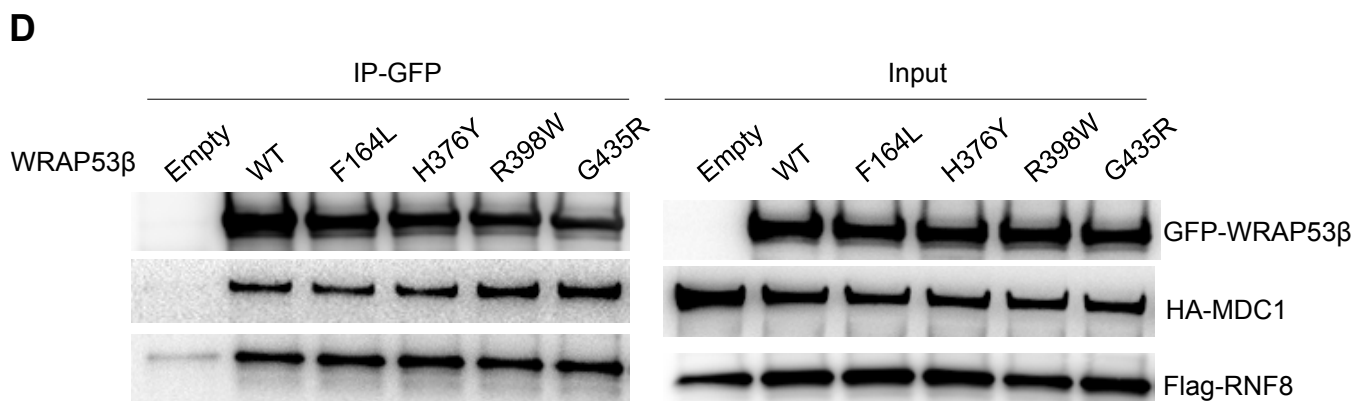

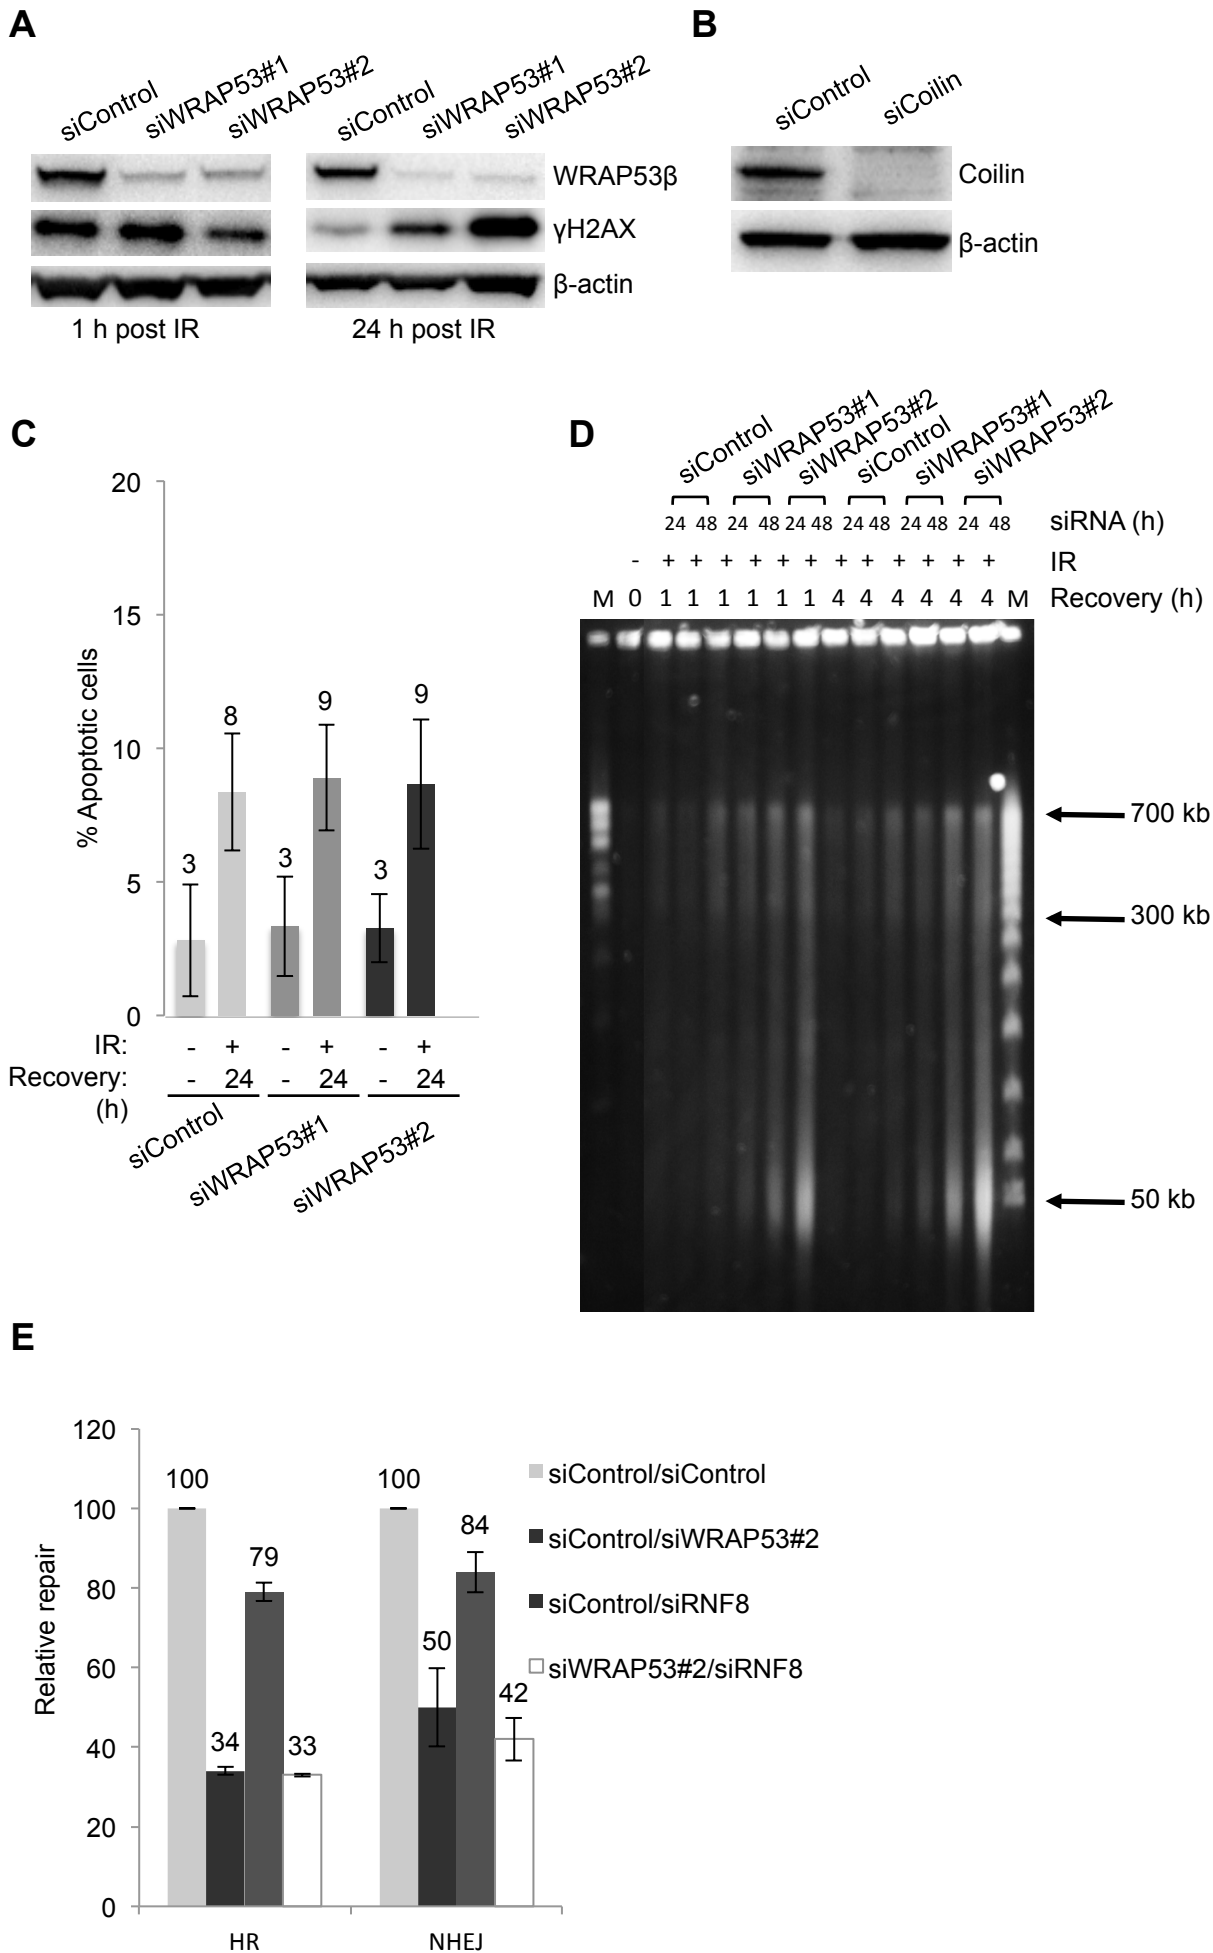

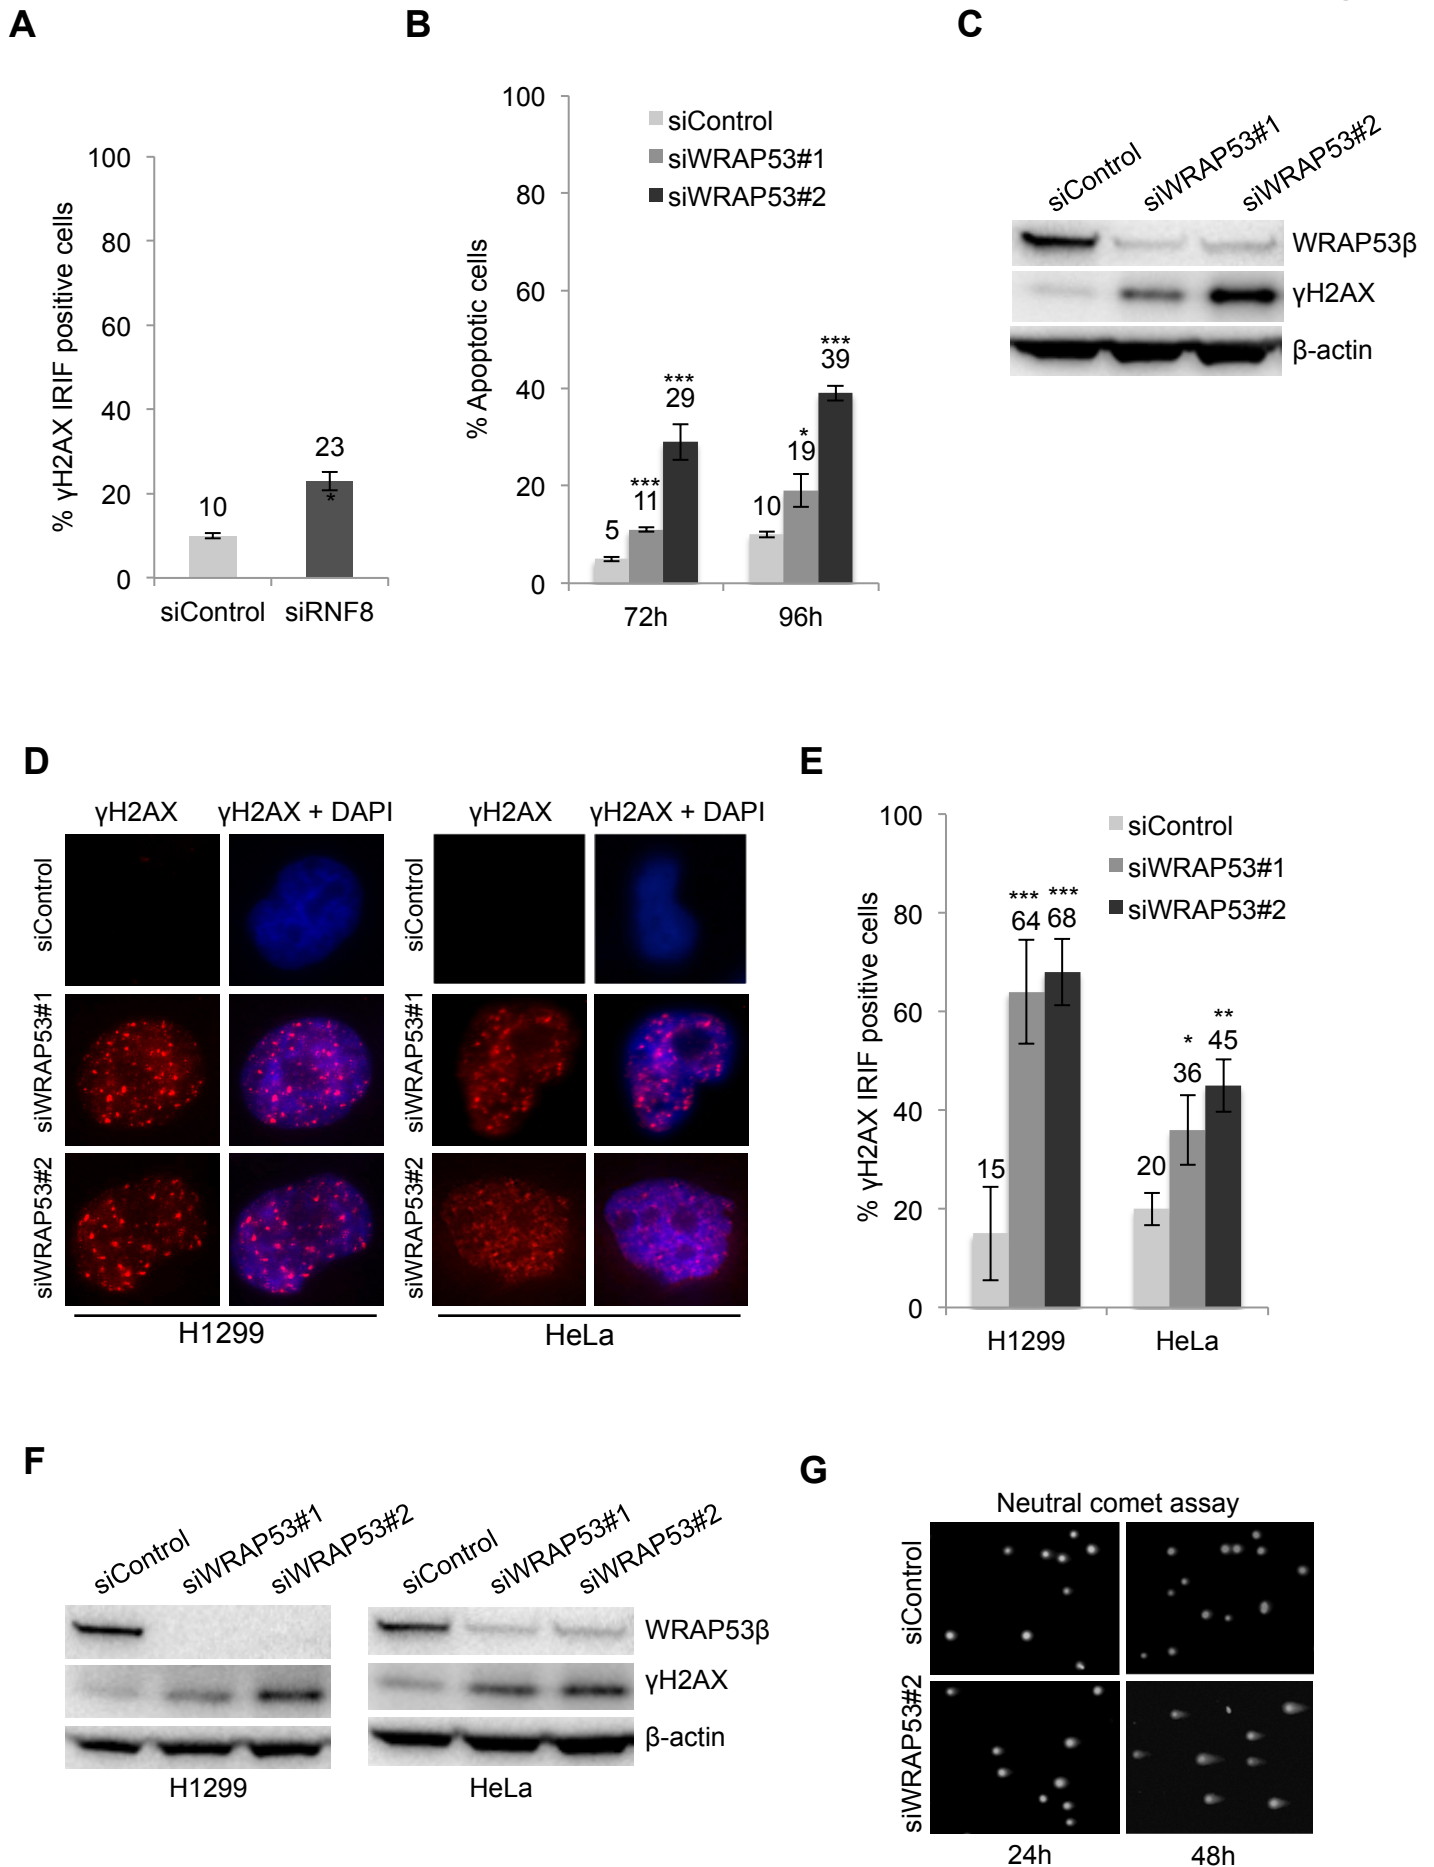

Supplement: supp_28.24.2726_Supplemental_Figures.pdf [file supp_28.24.2726_Supplemental_Figures.pdf]
